# Supplementary material
Source: PubMed Central journal article supplement (PMC10305933)

## Covaxin arm in Covaxin primed group

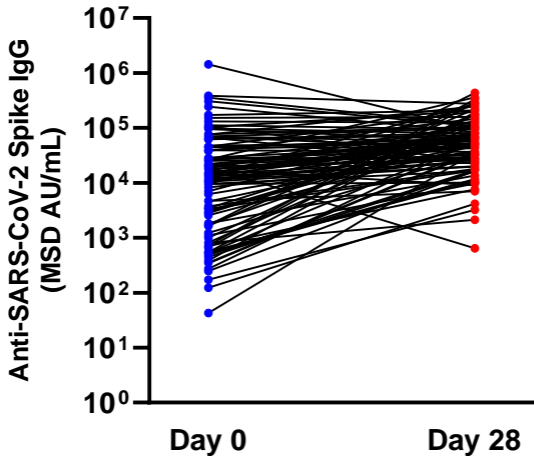

## Covishield arm in Covaxin primed group

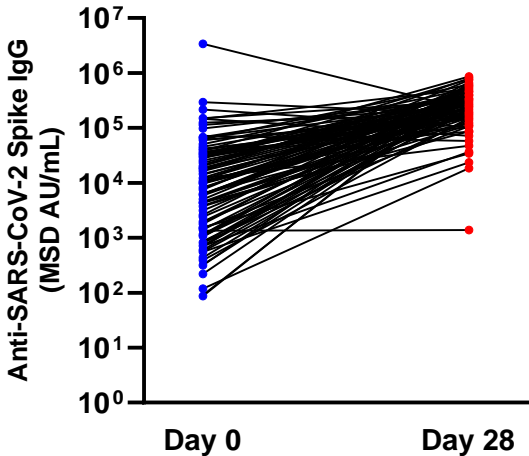

## Covaxin arm in Covaxin primed group

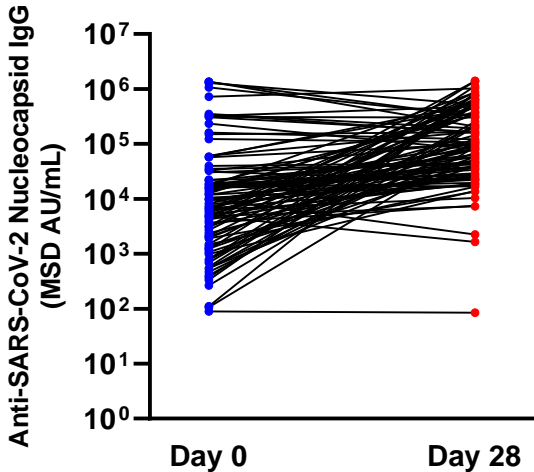

# Covishield arm in Covaxin primed group

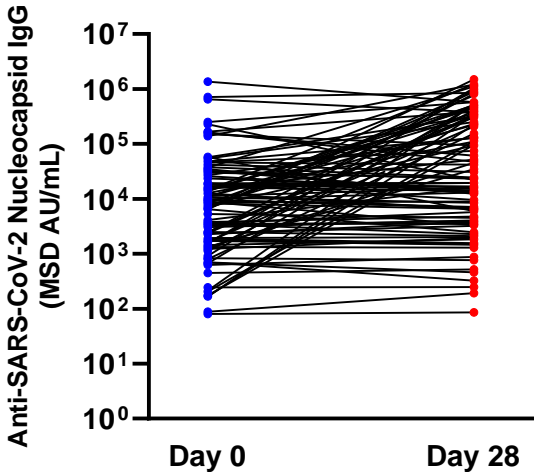

## Covaxin arm in Covaxin primed group

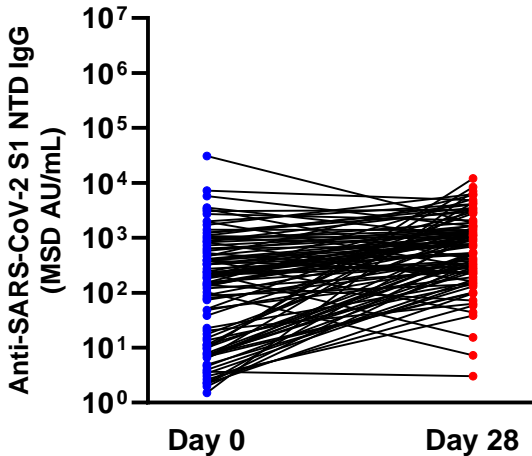

## Covishield arm in Covaxin primed group

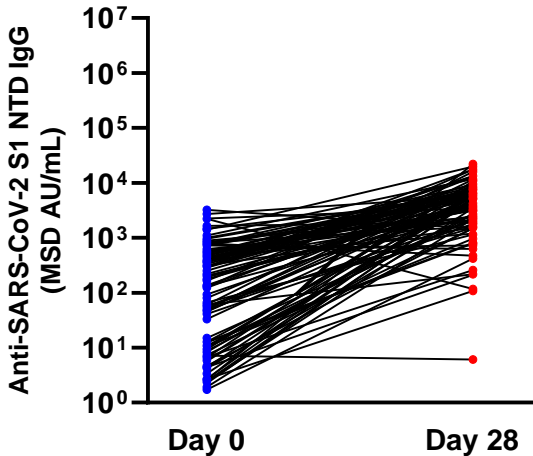

## Covaxin arm in Covaxin primed group

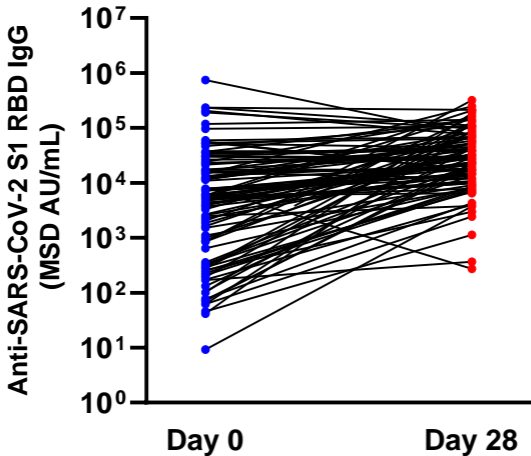

## Covishield arm in Covaxin primed group

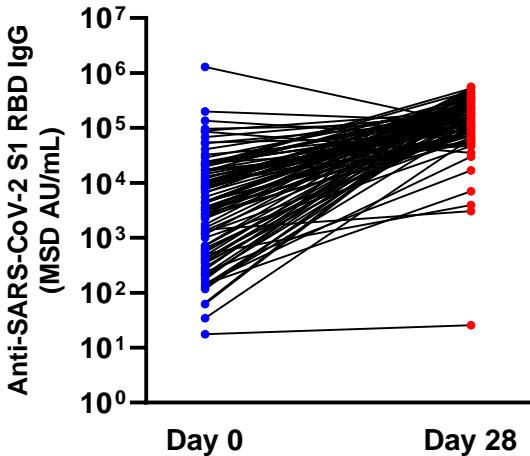



## Covaxin arm in Covaxin primed group

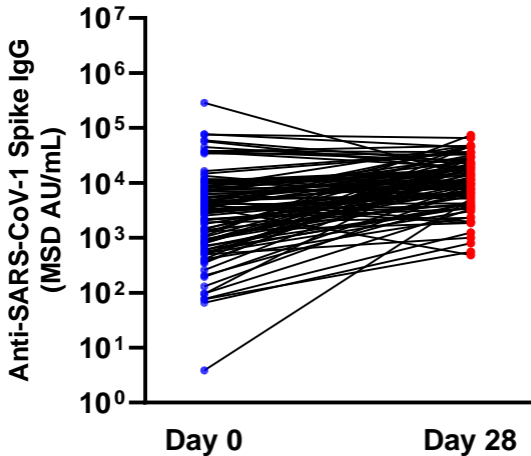

## Covishield arm in Covaxin primed group

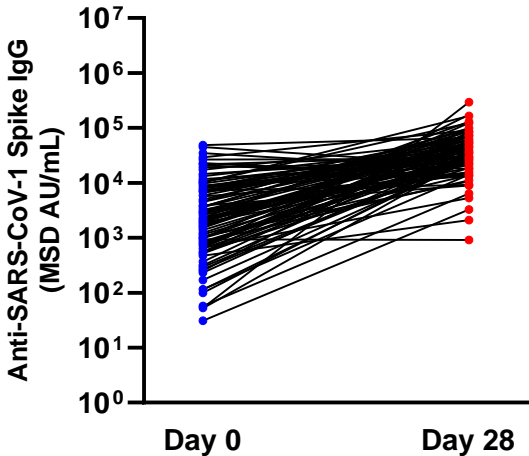

## Covaxin arm in Covishield primed group

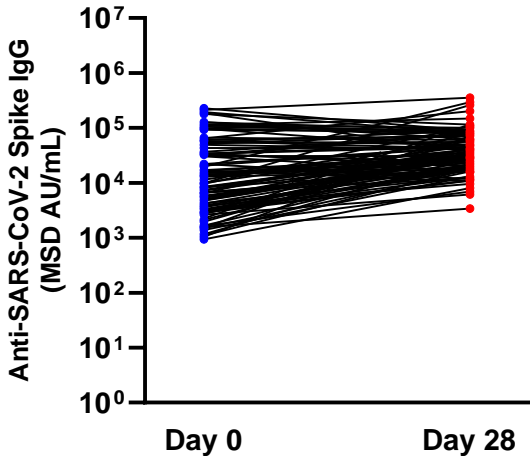

## Covishield arm in Covishield primed group

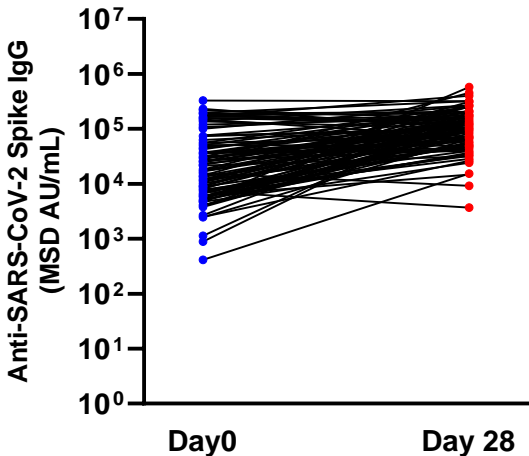

## Covaxin arm in Covishield primed group

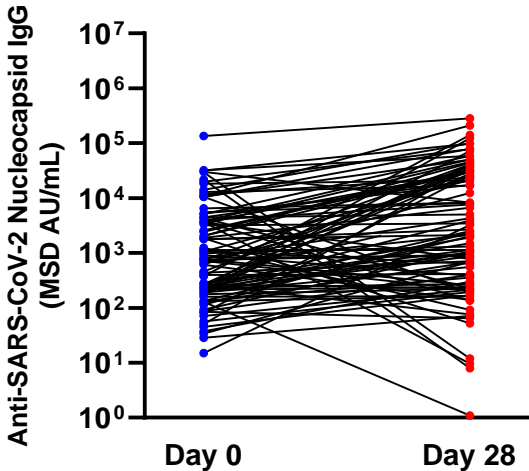

## Covishield arm in Covishield primed group

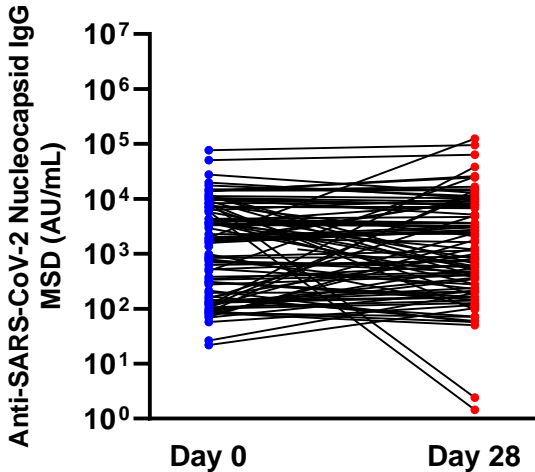

## Covaxin arm in Covishield primed group

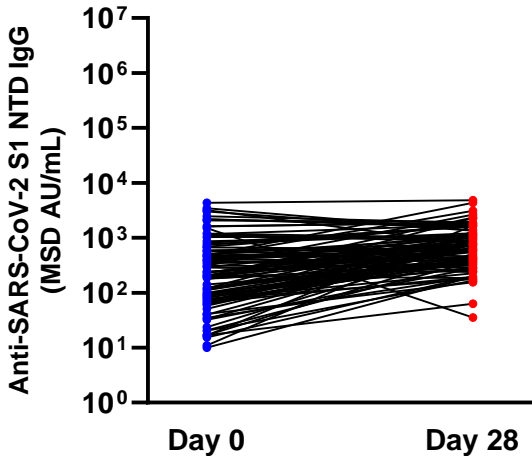

## Covishield arm in Covishield primed group

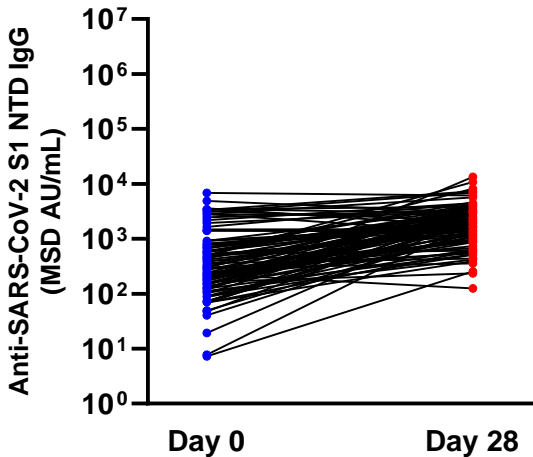



## Covaxin arm in Covishield primed group

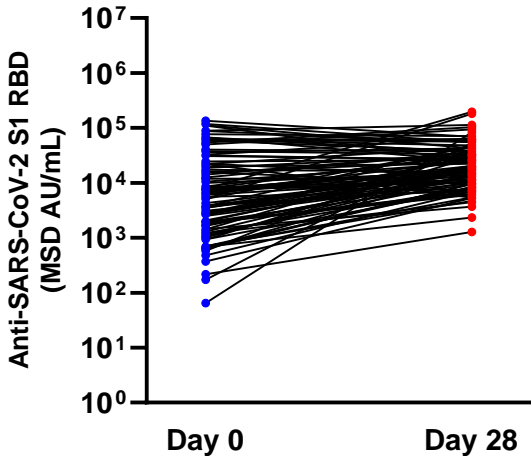

## Covishield arm in Covishield primed group

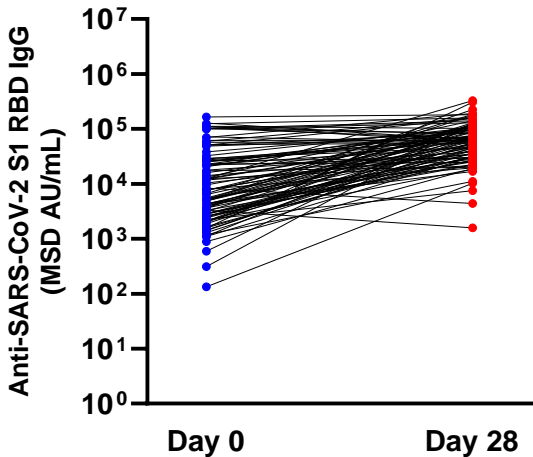

## Covaxin arm in Covishield primed group

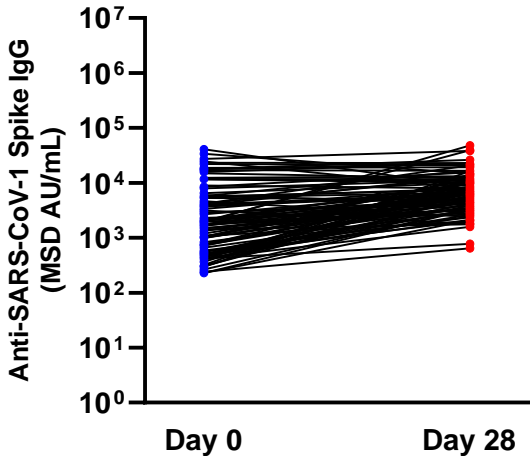

## Covishield arm in Covishield primed group

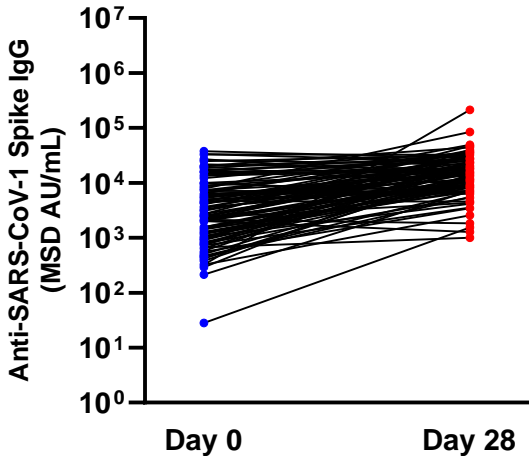

Supplement: mmc2.pdf [file mmc2.pdf]
