# Supplementary material
Source: PubMed Central journal article supplement (PMC10305933)

# Covaxin arm in the Covaxin primed group during Omicron wave

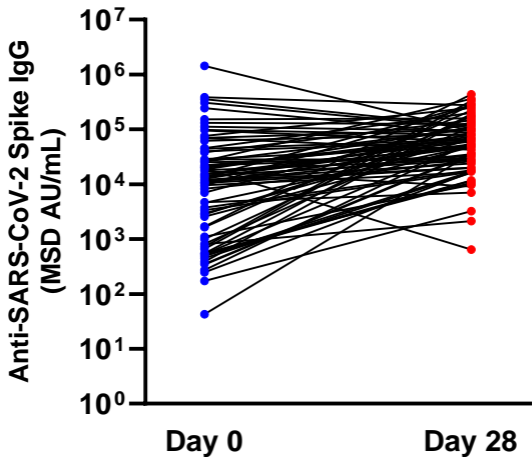

# Covishield arm in the Covaxin primed group during Omicron wave

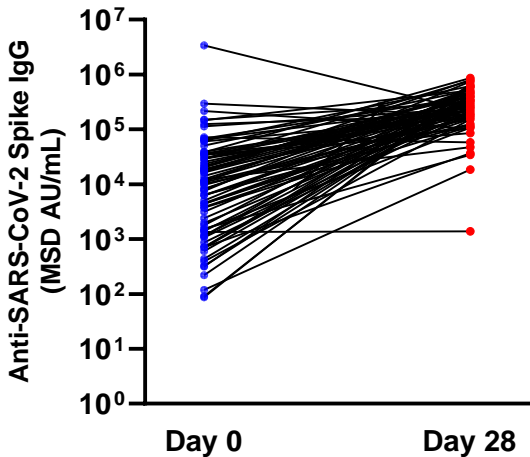





# Covaxin arm in the Covaxin primed group during Omicron wave

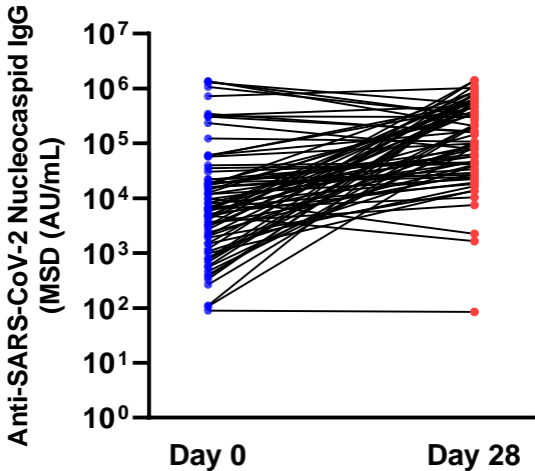



# Covaxin arm in the Covaxin primed group before Omicron wave

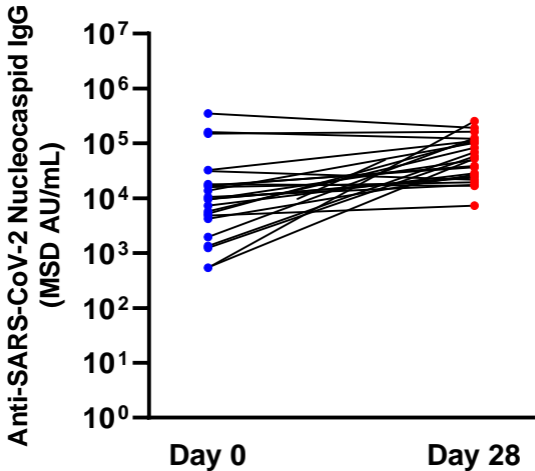

# Covishield arm in the Covaxin primed group before Omicron wave

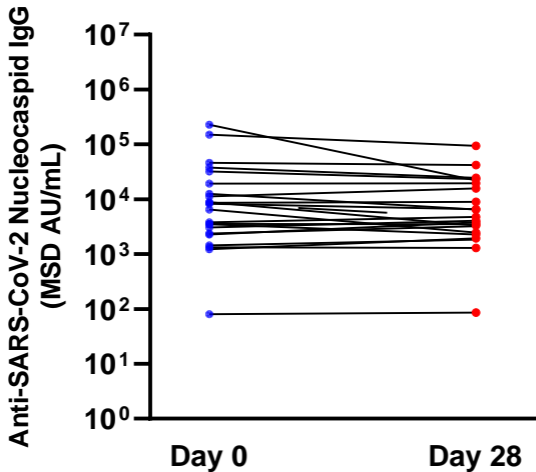

Supplement: mmc3.pdf [file mmc3.pdf]
