# Supplementary material
Source: PubMed Central journal article supplement (PMC10305933)

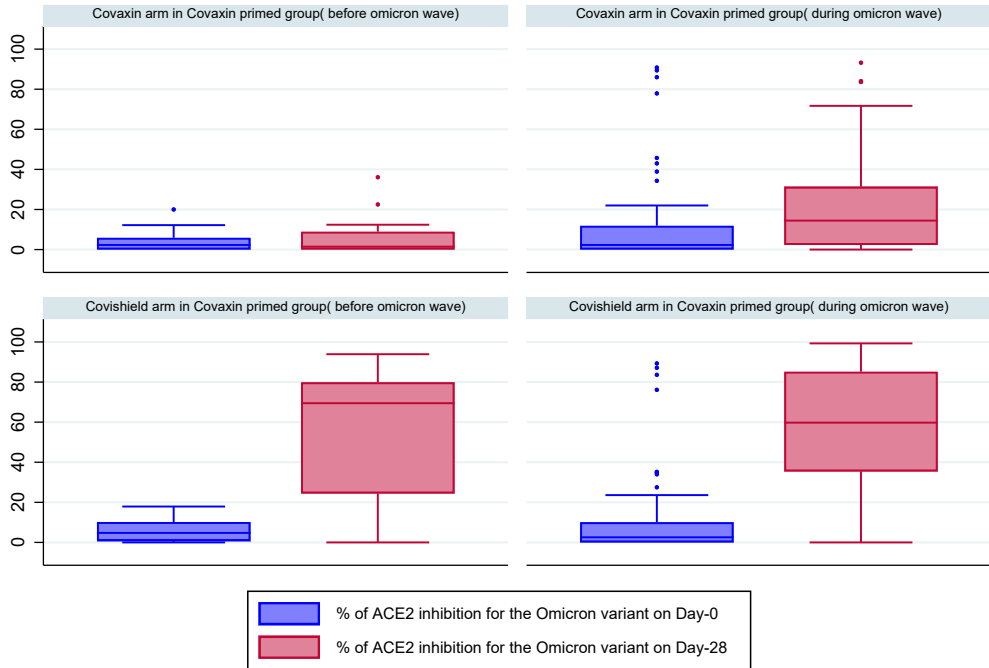

Percentage inhibition of ACE2 for the Omicron variant by arms, stratified by Omicron wave

Supplement: mmc4.pdf [file mmc4.pdf]
